# Supplementary material for: Tailored Near‐Infrared Photoemission in Fluoride Perovskites through Activator Aggregation and Super‐Exchange between Divalent Manganese Ions
Source: PubMed Central journal article supplement (PMC5115432; doi:10.1002/advs.201500089), 2015-05-22
Supplement: ADVS-2-0n-s001.pdf [file ADVS-2-0n-s001.pdf]

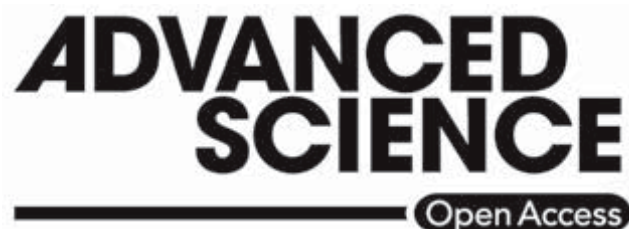

## Supporting Information

for *Adv. Sci.*, DOI: 10.1002/advs.201500089

### **Tailored Near-Infrared Photoemission in Fluoride Perovskites through Activator Aggregation and Super-Exchange between Divalent Manganese Ions**

*Enhai Song, Shi Ye, Tianhui Liu, Peipei Du, Rui Si, Xiping Jing, Sha Ding, Mingying Peng, Qinyuan Zhang, \* and Lothar Wondraczek \**

Copyright WILEY-VCH Verlag GmbH & Co. KGaA, 69469 Weinheim, Germany, 2013.

## Supporting Information

### **Tailored near-infrared photoemission in fluoride perovskites through activator aggregation and super-exchange between divalent manganese ions**

*Enhai Song<sup>1</sup>, Shi Ye<sup>1</sup>, Tianhui Liu<sup>2</sup>, Peipei Du<sup>3</sup>, Rui Si<sup>3</sup>, Xiping Jing<sup>2</sup>, Sha Ding<sup>1</sup>, Mingying Peng<sup>1</sup>, Qinyuan Zhang<sup>1,\*</sup>, and Lothar Wondraczek<sup>4,\*</sup>*

E. H. Song, Prof. S. Ye, S. Ding, Prof. M. Y. Peng, Prof. Q. Y. Zhang  
State Key Laboratory of Luminescent Materials and Devices  
Institute of Optical Communication Materials  
South China University of Technology  
Guangzhou, 510640, China  
E-mail: [qyzhang@scut.edu.cn](mailto:qyzhang@scut.edu.cn)

T. H. Liu, Prof. X. P. Jing  
Beijing National Laboratory for Molecular Sciences, State Key Laboratory of Rare Earth Materials Chemistry and Applications, College of Chemistry and Molecular Engineering, Peking University, Beijing 100871, China

P. P. Du, Prof. R. Si  
Shanghai Institute of Applied Physics, Chinese Academy Sciences, Shanghai Synchrotron Radiation Facility, Shanghai 201204, China

Prof. L. Wondraczek  
Otto Schott Institute of Materials Research, University of Jena, 07743 Jena, Germany  
E-mail: [lothar.wondraczek@uni-jena.de](mailto:lothar.wondraczek@uni-jena.de)

### **Supplementary Methods**

**Chemicals and materials.** Reagents: Yb<sub>2</sub>O<sub>3</sub> (99.998%), C<sub>4</sub>H<sub>6</sub>MgO<sub>4</sub>·4H<sub>2</sub>O (99.98%), C<sub>4</sub>H<sub>6</sub>MnO<sub>4</sub>·4H<sub>2</sub>O (99.99%), C<sub>4</sub>H<sub>6</sub>ZnO<sub>4</sub>·2H<sub>2</sub>O (99.99%), C<sub>4</sub>H<sub>6</sub>CdO<sub>4</sub>·2H<sub>2</sub>O (99.99%), KF (99.9%), NaF (99.9%), CsF (99.9%), RbF (99.9%), HNO<sub>3</sub> (analytical grade) and oleic acid (90%). Yb<sub>2</sub>O<sub>3</sub> was supplied by Alfa Aesar Reagent Company, other chemicals were supplied by Aladdin Industrial Corporation. All of the chemicals were used as received without further purification.

**Synthesis of  $\text{KMgF}_3:\text{Yb}^{3+}/\text{Mn}^{2+}$ .** A series of  $\text{KMg}_{(1-x)}\text{F}_3:\text{Mn}^{2+}_x$  ( $0.01 \leq x \leq 1.0$ ) and  $\text{KMg}_{(1-x-y)}\text{F}_3:\text{Yb}^{3+}_y/\text{Mn}^{2+}_x$  ( $0.01 \leq x \leq 0.40$ ;  $y = 0.005$ ) samples were synthesised using a facile hydrothermal method. The typical synthesis procedures used in this study were as follows.

Firstly, a  $\text{Yb}(\text{NO}_3)_3$  solution (0.02 mol/L) was obtained by dissolving  $\text{Yb}_2\text{O}_3$  in hot  $\text{HNO}_3$  solution. Then, 12 mmol of KF was completely dissolved in 10 mL of distilled water, and 15 mL of an aqueous solution containing stoichiometric amounts of  $\text{C}_4\text{H}_6\text{MgO}_4 \cdot 4\text{H}_2\text{O}$ ,  $\text{C}_4\text{H}_6\text{MnO}_4 \cdot 4\text{H}_2\text{O}$  and  $\text{Yb}(\text{NO}_3)_3$  were dropped into the KF solution under vigorous stirring. After stirring for 20 minutes, the resulting transparent solution was transferred to a 50-mL Teflon-lined autoclave, which was held at 220 °C for 24 h. After reaction, the system was naturally cooled down to room temperature, and the products were collected and centrifuged several times with distilled water. Finally, absolute ethanol was used to remove any soluble residues, and the products were dried at 60 °C for 10 h.

**Synthesis of  $\text{AMnF}_3$  (A = K, Na and Cs).** Here, 15 mL of ethanol and 5 mL of oleic acid were mixed under magnetic stirring to form a homogeneous solution. Then, 5 mL of an aqueous solution containing 4 mmol of  $\text{C}_4\text{H}_6\text{MnO}_4 \cdot 4\text{H}_2\text{O}$  were added to the solution under vigorous stirring. Finally, 5 mL of an aqueous solution containing 12 mmol of KF (or NaF or CsF) were added to the complex, still stirring. The mixture was agitated for 30 min and transferred to a 50-mL autoclave. The autoclave was then sealed, and the mixture hydrothermally treated at 220 °C for 24 h. After the reaction, the system was naturally cooled back to room temperature. The obtained product was centrifuged, washed and dried as above.

**Synthesis of  $\text{AB}_{(1-x-y)}\text{F}_3:\text{Yb}^{3+}_y/\text{Mn}^{2+}_x$  ( $x = 0.05$  and  $0.20$ ;  $y = 0.005$ ) (A = K, Rb and Cs; B = Mg, Zn and Cd).** Again, 15 mL of ethanol and 5 mL of oleic acid were mixed and magnetically stirred to form a homogeneous solution. Then, 5 mL of an aqueous solution containing stoichiometric amounts of  $\text{C}_4\text{H}_6\text{MgO}_4 \cdot 4\text{H}_2\text{O}$ ,  $\text{C}_4\text{H}_6\text{MnO}_4 \cdot 4\text{H}_2\text{O}$  and  $\text{Yb}(\text{NO}_3)_3$  were added to the solution under vigorous stirring. Finally, 5 mL of an aqueous solution containing 12 mmol of KF was added to the complex. The mixture was agitated for 30 min and transferred to a 50-mL autoclave. The autoclave was then sealed,

and the mixture hydrothermally treated at 220 °C for 24 h. After the reaction was completed, the system was naturally cooled down to room temperature. The obtained product was centrifuged, washed and dried as above.

**Theoretical calculations.** In the CASTEP code, the wave functions of valence electrons were expanded in an ultrasoft pseudopotential plane-wave basis with the specific cut-off energy  $E_{cut}$ . The exchange-correlation functional employed was the Perdew, Burke and Ernzerhof (PBE) implementation of the spin-polarized Generalized Gradient Approximation (GGA).<sup>[1,2]</sup> It is reported that the GGA would result in more exact data than the Local Density Approximation (LDA) for spin polarized system.<sup>[1-3]</sup> Six different  $2 \times 2 \times 4$  supercells (80 atoms) with two  $Mg^{2+}$  ions substituted by two  $Mn^{2+}$  ions according to the ICSD card No. 94089 structure model were used as initial models. The initial supercell parameters were  $a = b = 7.9794 \text{ \AA}$ ,  $c = 15.9588 \text{ \AA}$ . Each geometry optimization by Broyden-Fletcher-Goldfarb-Shannon (BFGS) algorithm<sup>[4]</sup> was performed to the model. Both  $E_{cut}$  and k-point mesh were tested and were set to 310 eV and a  $3 \times 3 \times 3$  Monkhorst-Pack grid, which were sufficient for energy convergence. The structures were considered to be converged when the force on each ion was less than  $\sim 0.05 \text{ eV/\AA}$ , with a maximum displacement of  $\sim 0.002 \text{ \AA}$  and a convergence in the total energy of about  $2 \times 10^{-6} \text{ eV/atom}$ . To understand the coupling interaction between  $Mn^{2+}$  ions, the electronic spin alignment for  $Mn^{2+}$  ions in the  $KMgF_3$  host were set to be FM and AFM. That is, possible FM coupling and AFM coupling for  $Mn^{2+}$  aggregates were adopted in the geometry optimization. The energy difference of the two coupling modes for each model were also calculated ( $\Delta E = E_{AFM} - E_{FM}$ ).

## Supplementary Tables and Table captions:

**Table S1.** Initial lattice constants for a  $2 \times 2 \times 4$  supercell of  $\text{KMgF}_3$ .

| Lattice constants     | value     |
|-----------------------|-----------|
| $a$ (Å)               | 7.9794    |
| $b$ (Å)               | 7.9794    |
| $c$ (Å)               | 15.9588   |
| $\alpha$ (degree)     | 90.0000   |
| $\beta$ (degree)      | 90.0000   |
| $\gamma$ (degree)     | 90.0000   |
| $V$ (Å <sup>3</sup> ) | 1016.1100 |

**Table S2.** Optimized cell parameters and forming energy ( $E$ ) of six possible substitution geometry modes (denoted as M1, M2, M3, M4, M5 and M6) for a  $2 \times 2 \times 4$  supercell of  $\text{KMgF}_3:\text{Mn}^{2+}$  with two  $\text{Mg}^{2+}$  ions substituted by two antiferromagnetic coupling (AFM)  $\text{Mn}^{2+}$  ions.

| Parameters                | M1          | M2          | M3          | M4          | M5          | M6          |
|---------------------------|-------------|-------------|-------------|-------------|-------------|-------------|
| $a$ (Å)                   | 8.2874      | 8.2865      | 8.2867      | 8.2901      | 8.2853      | 8.2856      |
| $b$ (Å)                   | 8.2874      | 8.286548    | 8.284929    | 8.290169    | 8.2853      | 8.2856      |
| $c$ (Å)                   | 16.5722     | 16.5661     | 16.5629     | 16.5561     | 16.5676     | 16.5563     |
| $\alpha$ (degree)         | 89.9999     | 89.9999     | 90.0000     | 90.0000     | 90.0000     | 90.0000     |
| $\beta$ (degree)          | 90.0000     | 90.0000     | 90.0000     | 90.0000     | 90.0002     | 89.9999     |
| $\gamma$ (degree)         | 89.9999     | 90.0000     | 89.9999     | 89.9999     | 89.9998     | 90.0000     |
| $V$ (Å <sup>3</sup> )     | 1138.2076   | 1137.5432   | 1137.1298   | 1137.8466   | 1137.3173   | 1136.6289   |
| $E_{\text{AFM}}$ (eV/mol) | -59330.9750 | -59330.9671 | -59330.9896 | -59330.9701 | -59330.9837 | -59330.9744 |
| $\Delta E_a$ (eV/mol)     | 0.0000      | 0.0079      | -0.0146     | 0.0049      | -0.0087     | 0.0006      |
| Two shortest Mn-          | 4.1437      | 8.2865      | 5.8596      | 9.2686      | 7.1755      | 10.1474     |
| Mn distances (Å)          | 8.2874      | 8.2865      | 8.2867      | 8.2901      | 8.2853      | 8.2856      |

$$\Delta E_a = E_{\text{AFM}}(\text{Mi}) - E_{\text{AFM}}(\text{M1}) \quad (i = 1, 2, 3, 4, 5 \text{ and } 6).$$

**Table S3.** Optimized cell parameters and forming energy ( $E$ ) of six possible substitution geometry modes (denoted as M1, M2, M3, M4, M5 and M6) for a  $2 \times 2 \times 4$  supercell of  $\text{KMgF}_3:\text{Mn}^{2+}$  with two  $\text{Mg}^{2+}$  ions substituted by two ferromagnetic coupling (FM)  $\text{Mn}^{2+}$  ions.

| Parameters               | M1          | M2          | M3          | M4          | M5          | M6          |
|--------------------------|-------------|-------------|-------------|-------------|-------------|-------------|
| $a$ (Å)                  | 8.2892      | 8.2867      | 8.2873      | 8.2895      | 8.2864      | 8.2903      |
| $b$ (Å)                  | 8.2892      | 8.28678     | 8.2859      | 8.2912      | 8.2864      | 8.2903      |
| $c$ (Å)                  | 16.5712     | 16.5677     | 16.5625     | 16.5582     | 16.5656     | 16.5557     |
| $\alpha$ (degree)        | 90.0000     | 90.0000     | 90.0000     | 90.0000     | 89.9999     | 90.0000     |
| $\beta$ (degree)         | 90.0000     | 90.0000     | 90.0000     | 90.0000     | 90.0000     | 90.0000     |
| $\gamma$ (degree)        | 90.0000     | 90.0000     | 89.9999     | 90.0000     | 90.0000     | 90.0000     |
| $V$ (Å <sup>3</sup> )    | 1138.6469   | 1137.72135  | 1137.3273   | 1137.7748   | 1137.4788   | 1138.8743   |
| $E_{\text{FM}}$ (eV/mol) | -59330.9353 | -59330.9644 | -59330.9888 | -59330.9709 | -59330.9833 | -59330.9649 |
| $\Delta E_b$ (eV/mol)    | 0.0000      | -0.0291     | -0.0535     | -0.0356     | -0.0480     | -0.0296     |
| Two shortest Mn-         | 4.1446      | 8.2867      | 5.8573      | 9.2585      | 7.1752      | 10.1433     |
| Mn distances (Å)         | 8.2892      | 8.2867      | 8.2873      | 8.2895      | 8.2864      | 8.2903      |

$$\Delta E_b = E_{\text{FM}}(\text{Mi}) - E_{\text{FM}}(\text{M1}) \quad (i = 1, 2, 3, 4, 5 \text{ and } 6).$$

**Table S4.** Forming energy difference between  $E_{\text{AFM}}$  and  $E_{\text{FM}}$  of the six possible substitution geometry modes (denoted as M1, M2, M3, M4, M5 and M6) for a  $2 \times 2 \times 4$  supercell of  $\text{KMgF}_3:\text{Mn}^{2+}$  with two  $\text{Mg}^{2+}$  ions substituted by two  $\text{Mn}^{2+}$  ions

| Parameters                | M1          | M2          | M3          | M4          | M5          | M6          |
|---------------------------|-------------|-------------|-------------|-------------|-------------|-------------|
| $E_{\text{AFM}}$ (eV/mol) | -59330.9750 | -59330.9671 | -59330.9896 | -59330.9701 | -59330.9837 | -59330.9744 |
| $E_{\text{FM}}$ (eV/mol)  | -59330.9353 | -59330.9644 | -59330.9888 | -59330.9709 | -59330.9833 | -59330.9649 |
| $\Delta E$ (eV/mol)       | -0.0397     | -0.0027     | -0.0008     | 0.0008      | -0.0004     | -0.0095     |

$$\Delta E = E_{\text{AFM}} - E_{\text{FM}}.$$



## Supplementary Figures and Figure captions:

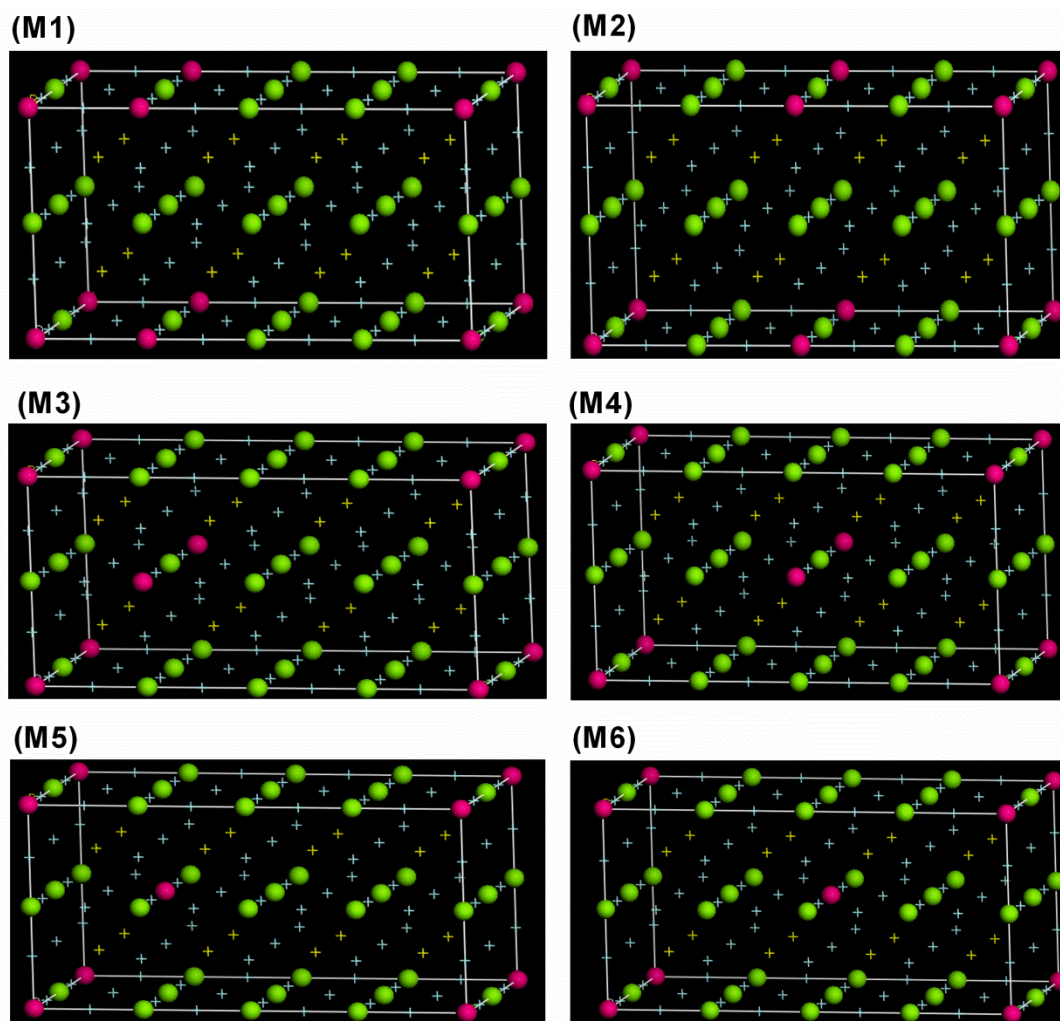

**Figure S1.** Six possible substitution geometry models (denoted as M1, M2, M3, M4, M5 and M6) for a  $2 \times 2 \times 4$  supercell of  $\text{KMgF}_3:\text{Mn}^{2+}$  with two  $\text{Mg}^{2+}$  ions substituted by two  $\text{Mn}^{2+}$  ions. The green ball, red ball, indigo + and yellow + denote as Mg, Mn, F and K ions, respectively.

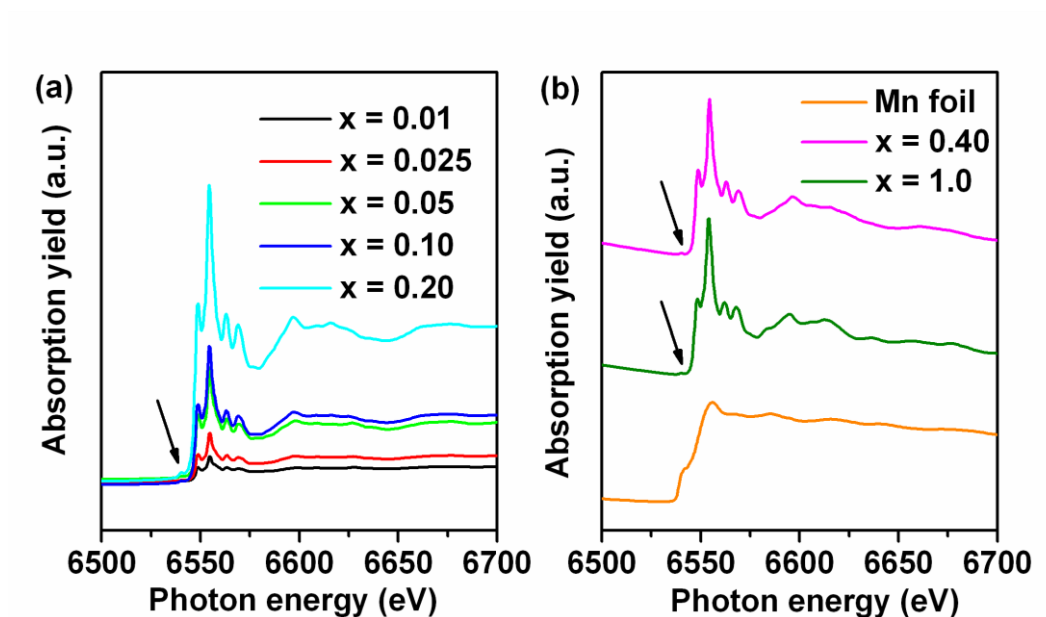

**Figure S2.** (a) XANES spectra of  $\text{KMg}_{(1-x)}\text{F}_3:\text{Mn}^{2+}$  ( $0.01 \leq x \leq 0.20$ ) (fluorescence mode). (b) XANES spectra of  $\text{KMg}_{(1-x)}\text{F}_3:\text{Mn}^{2+}$  ( $x = 0.40$  and  $1.0$ ) and Mn foil (transmission mode). The spectra of  $\text{KMg}_{(1-x)}\text{F}_3:\text{Mn}^{2+}$  ( $0.01 \leq x \leq 1.0$ ) are mutually quite similar, but distinctly different from the reference spectrum of the Mn foil, confirming the presence of  $\text{Mn}^{2+}$  dopants in  $\text{KMgF}_3$  host, rather than secondary phases. For all  $\text{Mn}^{2+}$ -containing perovskite samples, the characteristic peak in the first derivative of the edge spectra was observed at  $\sim 6549$  eV, and a very weak pre-edge feature was consistently observed at  $\sim 6539$  eV (**arrow in Fig. S2**), indicating the valence state of Mn in this system is +2.

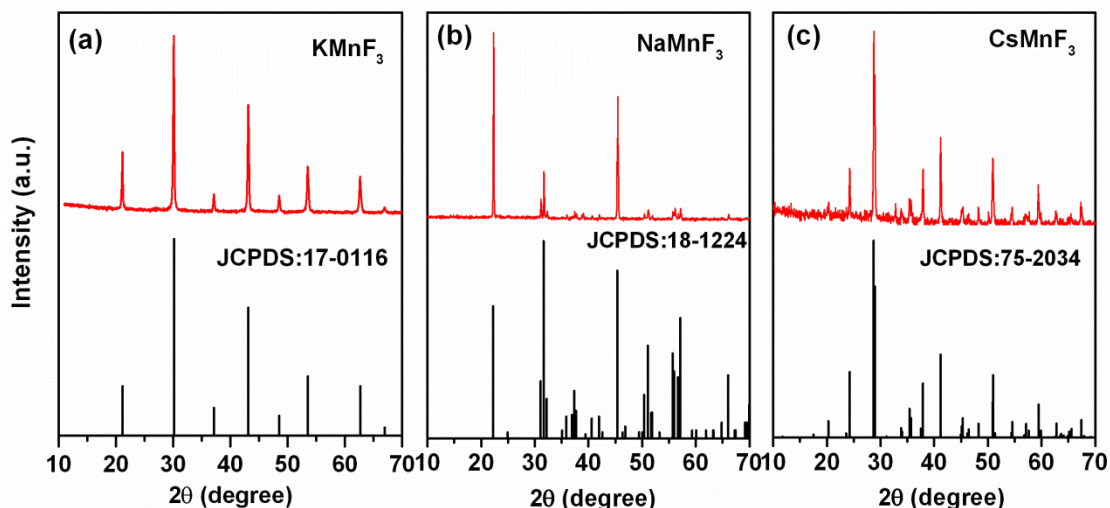

**Figure S3.** X-ray powder diffraction patterns of as-received  $\text{KMnF}_3$ ,  $\text{NaMnF}_3$  and  $\text{CsMnF}_3$  nanocrystals. Joint Committee on Powder Diffraction Standards (JCPDS) files number 17-0116, 18-1224 and 75-2034 are included for comparison. The compound  $\text{KMnF}_3$  exhibits a typical cubic perovskite structure with  $\text{Pm-3m}$  space group (No. 221) and the lattice constant  $a = 4.189 \text{ \AA}$ . The compound  $\text{NaMnF}_3$  is an orthorhombic perovskite with  $\text{Pnma}$  space group (No. 62) and lattice constants  $a = 5.748 \text{ \AA}$ ,  $b = 8.004 \text{ \AA}$  and  $c = 5.551 \text{ \AA}$ . The compound  $\text{CsMnF}_3$  is a hexagonal perovskite structure with  $\text{P63/mmc}$  space group (No. 194) and lattice constants  $a = b = 6.225 \text{ \AA}$  and  $c = 5.551 \text{ \AA}$ .

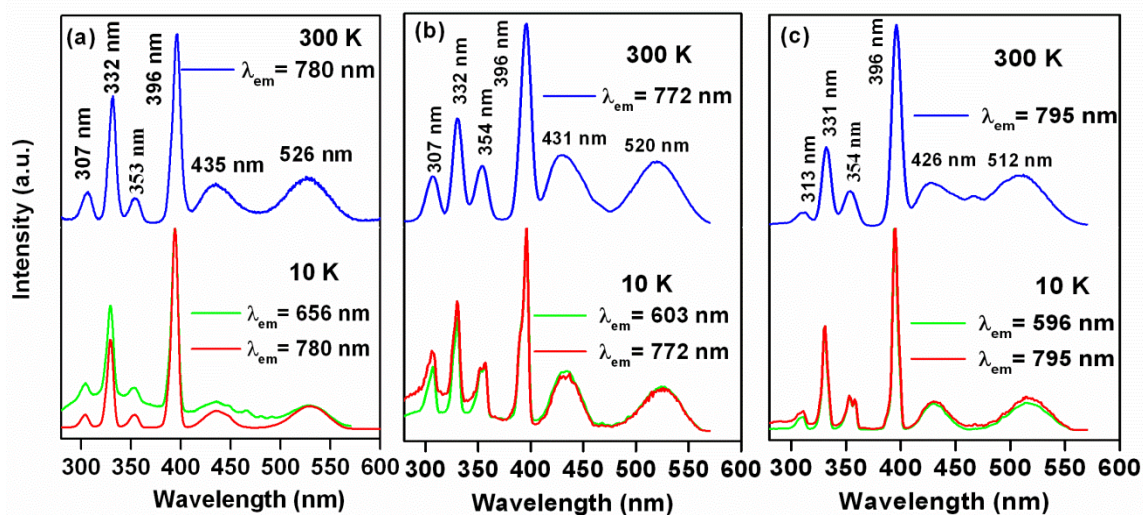

**Figure S4.** Excitation spectra of samples  $\text{KMnF}_3$  (a),  $\text{NaMnF}_3$  (b) and  $\text{CsMnF}_3$  (c) at 10 and 300 K. The six typical excitation peaks between 300 and 570 nm can be assigned to the electronic transitions of  $\text{Mn}^{2+}$  from the ground state  ${}^6A_1(S)$  to the excited states  ${}^4T_1(P)$ ,  ${}^4E(D)$ ,  ${}^4T_2(D)$ , [ ${}^4A_1(G)$ ,  ${}^4E(G)$ ],  ${}^4T_2(G)$  and  ${}^4T_1(G)$ .

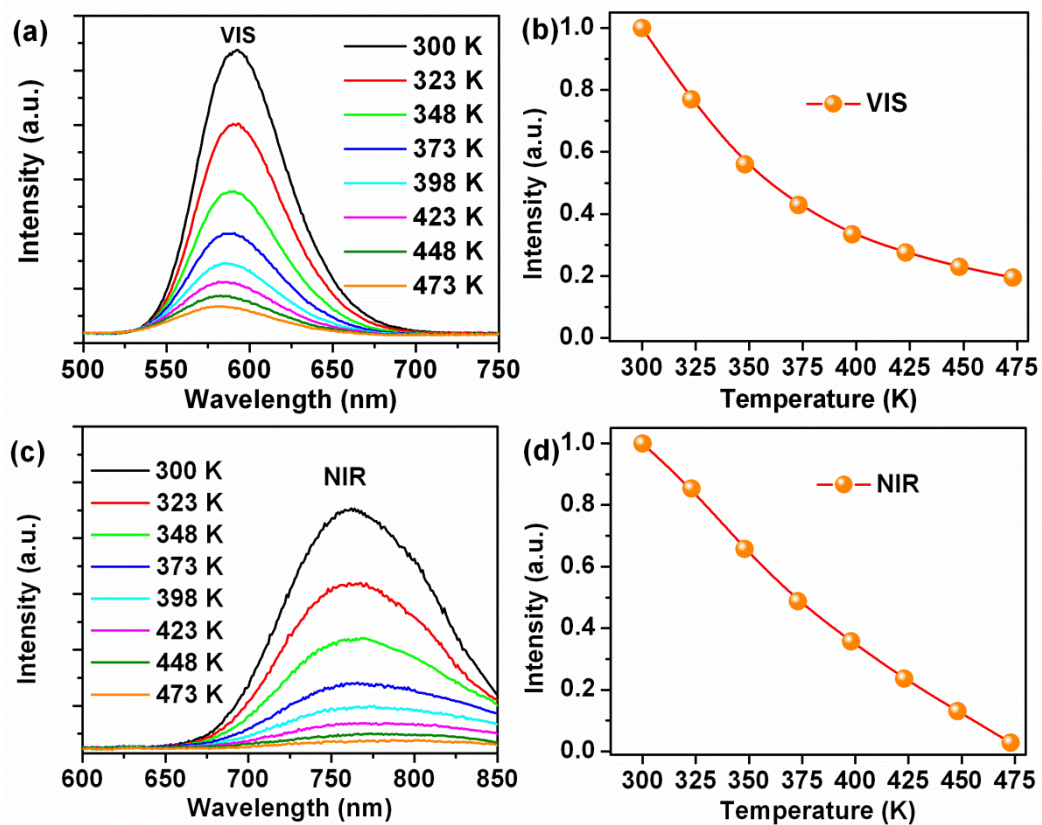

**Figure S5.** Temperature-dependent UC emission spectra and integrated intensity of  $\text{KMg}_{(1-x-y)}\text{F}_3:\text{Yb}^{3+}_y\text{Mn}^{2+}_x$  ( $x = 0.01$ ;  $y = 0.005$ ) (a and b) and  $\text{KMg}_{(1-x-y)}\text{F}_3:\text{Yb}^{3+}_y\text{Mn}^{2+}_x$  ( $x = 0.20$ ;  $y = 0.005$ ) upon excitation with a 976-nm LD at a power density of  $10 \text{ Wcm}^{-2}$ .

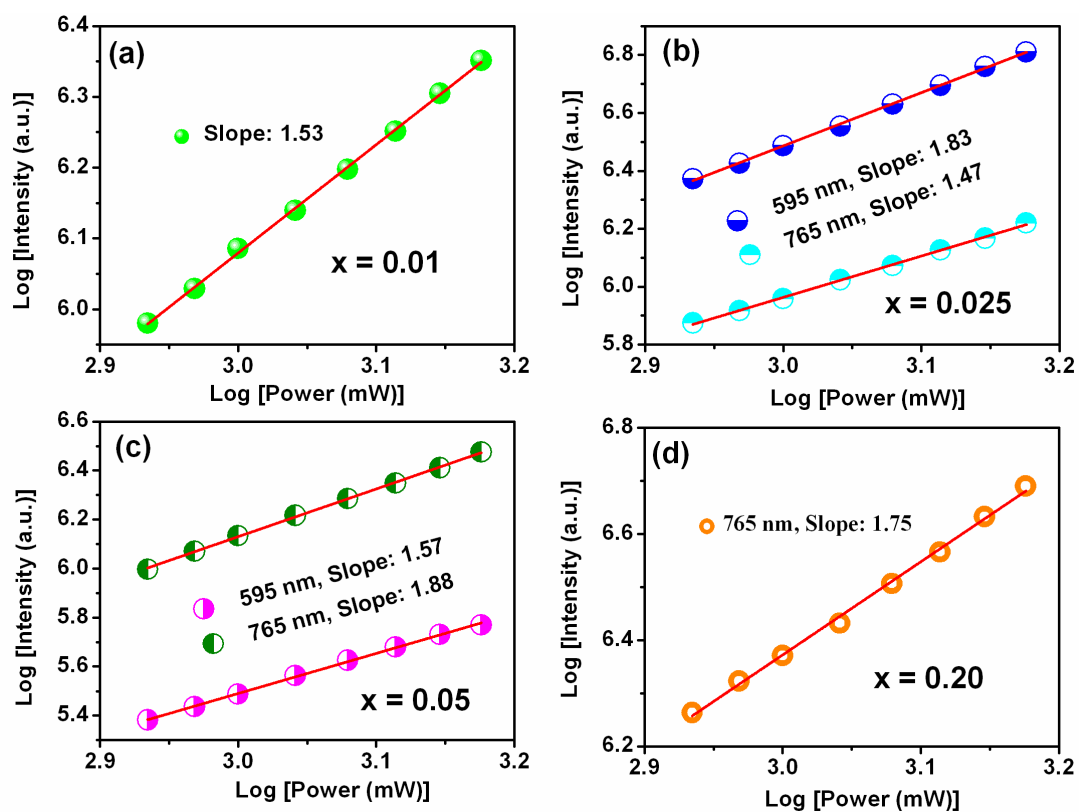

**Figure S6.** Plots of the upconversion emission intensity versus 976 nm laser pumping power for the two emission bands (VIS/NIR) of  $\text{Mn}^{2+}$  in  $\text{KMg}_{(1-x-y)}\text{F}_3:\text{Yb}^{3+}, \text{Mn}^{2+}_x$  ( $0.01 \leq x \leq 0.20$ ;  $y = 0.005$ ). (a) ( $x = 0.01$ ;  $y = 0.005$ ), (b) ( $x = 0.025$ ;  $y = 0.005$ ), (c) ( $x = 0.05$ ;  $y = 0.005$ ), and (d) ( $x = 0.20$ ;  $y = 0.005$ ).

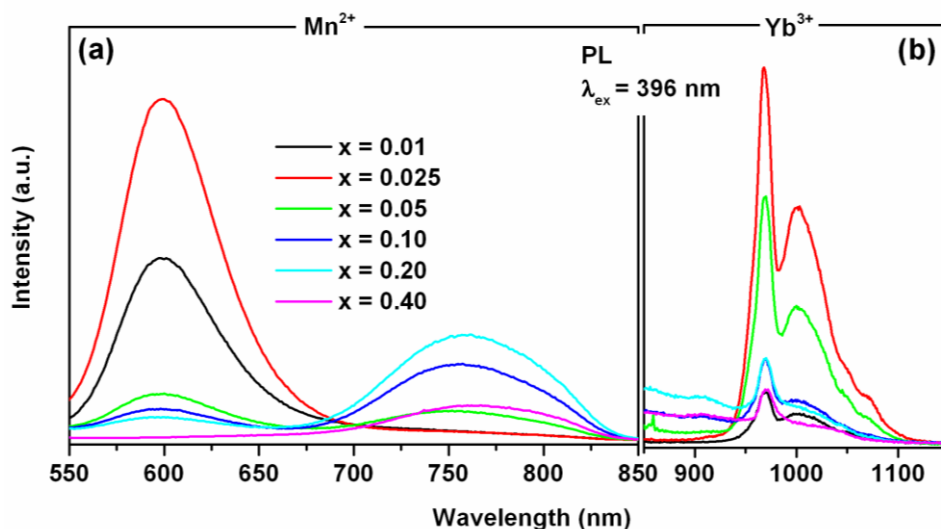

**Figure S7.** Room-temperature Stokes emission spectra of  $\text{KMg}_{(1-x-y)}\text{F}_3:\text{Yb}^{3+}_y,\text{Mn}^{2+}_x$  ( $0.01 \leq x \leq 0.40$ ;  $y = 0.005$ ) upon 396 nm light excitation. **(a)**  $\text{Mn}^{2+}$ -emission in the range of 550-850 nm and  $\text{Yb}^{3+}$ -emission in the range of 850-1200 nm **(b)**. It can be observed that the Stokes emission spectra of  $\text{KMg}_{(1-x-y)}\text{F}_3:\text{Yb}^{3+}_y,\text{Mn}^{2+}_x$  ( $0.01 \leq x \leq 0.40$ ;  $y = 0.005$ ) are similar to those of  $\text{KMg}_{(1-x)}\text{F}_3:\text{Mn}^{2+}_x$  ( $0.01 \leq x \leq 0.40$ ) (Fig.2a) upon 396 nm light excitation. The bands centered at 595 and 760 nm can be ascribed to the  ${}^4\text{T}_1({}^4\text{G}) \rightarrow {}^6\text{A}_1({}^6\text{S})$  transitions of isolated  $\text{Mn}^{2+}$  ions and  ${}^6\text{A}_1({}^6\text{S}) {}^4\text{T}_1({}^4\text{G}) \rightarrow {}^6\text{A}_1({}^6\text{S}) {}^6\text{A}_1({}^6\text{S})$  transitions of  $\text{Mn}^{2+}$ - $\text{Mn}^{2+}$  dimers, respectively. Additionally, the  $\text{Yb}^{3+}$ -emission centered at 972 nm ( ${}^2\text{F}_{5/2} \rightarrow {}^2\text{F}_{7/2}$ ) is also observed in  $\text{Yb}^{3+}$ - $\text{Mn}^{2+}$  codoped  $\text{KMgF}_3$  samples through  $\text{Mn}^{2+}$  excitation, indicating that  $\text{Mn}^{2+}$  and  $\text{Yb}^{3+}$  formed some unique emission centers in this system since  $\text{Mn}^{2+}$  and  $\text{Yb}^{3+}$  ions have no spectral overlap.

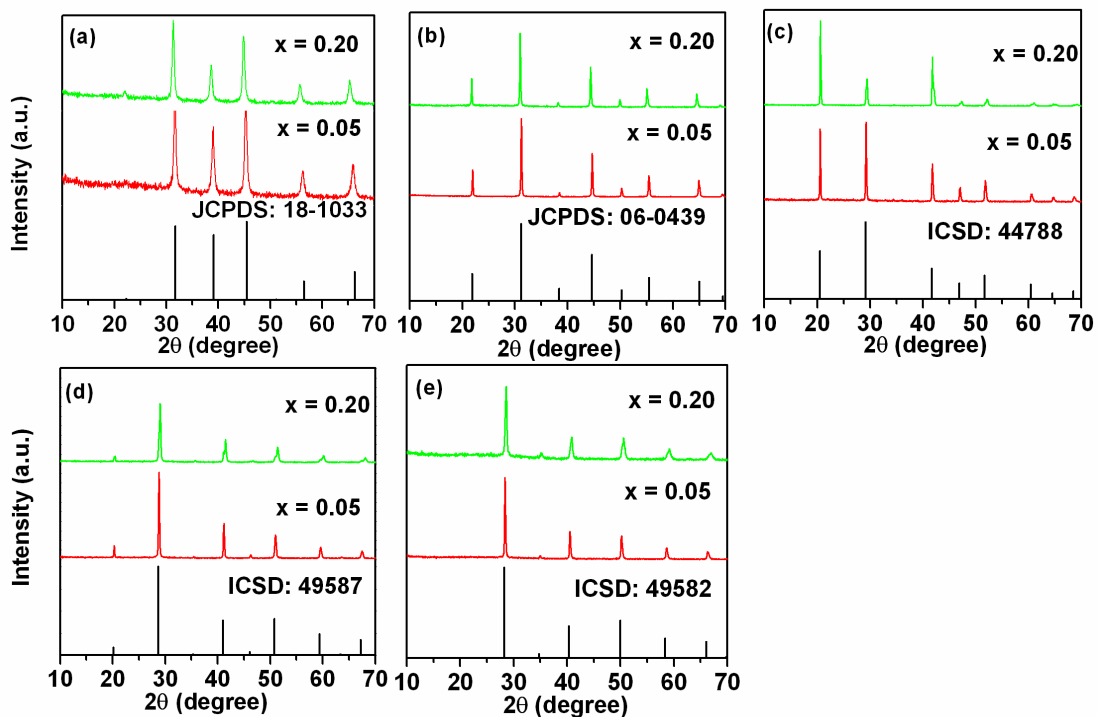

**Figure S8.** X-ray powder diffraction patterns of  $AB_{(1-x-y)}F_3:Yb^{3+}/Mn^{2+}_x$  ( $x = 0.05$  and  $0.20$ ;  $y = 0.005$ ) ( $A = K, Rb$  and  $Cs$ ;  $B = Mg, Zn$  and  $Cd$ ) and corresponding reference data (JCPDS or inorganic crystal structure database, ICSD).  $Yb^{3+}/Mn^{2+}$  codoped (a)  $KMgF_3$ , (b)  $KZnF_3$ , (c)  $KCdF_3$ , (d)  $RbCdF_3$  and (e)  $CsCdF_3$ .



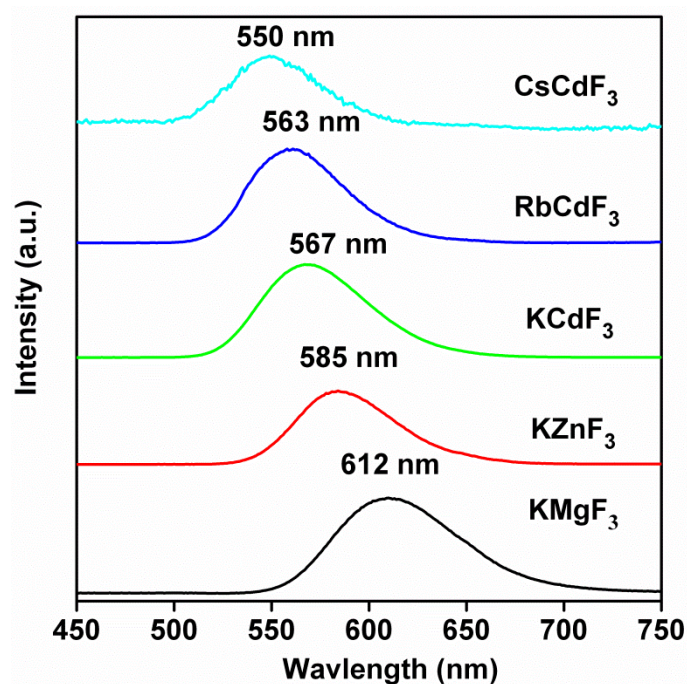

**Figure S9.** Room-temperature upconversion emission spectra of  $AB_{(1-x-y)}F_3:Yb^{3+}/Mn^{2+}$  ( $x = 0.05$ ,  $y = 0.005$ ) ( $A = K, Rb$  and  $Cs$ ;  $B = Mg, Zn$  and  $Cd$ ) upon excitation with a 976-nm laser diode at a power density of  $10 \text{ Wcm}^{-2}$ .

### Supplementary References

- [1] J. P. Perdew, K. Burke, M. Ernzerhof, *Phys. Rev. Lett.* **1996**, *77*, 3865.
- [2] J. P. Perdew, Y. Wang, *Phys. Rev. B* **1992**, *45*, 13244.
- [3] M. A. Kamran, R. B. Liu, L. J. Shi, Z. A. Li, T. Marzi, C. Schöppner, M. Farle, B. S. Zou, *Nanotech.* **2014**, *25*, 385201.
- [4] B. G. Pfrommer, M. Côté, S. G. Louie, M. L. Cohen, *J. Comput. Phys.* **1997**, *131*, 233.
